# Supplementary material for: Fabrication of 3D HierarchicalSphericalHoneycomb-Like Nd2O3/Co3O4/Graphene/Nickel Foam Composite Electrode Material for High-Performance Supercapacitors
Source: MDPI journal article supplement (doi:10.3390/ma16041694), 2023-02-17
Supplement: s1 [file s1]

# **Nd<sub>2</sub>O<sub>3</sub>/Co<sub>3</sub>O<sub>4</sub>/graphene/nickel foam composite electrode material for high-performance supercapacitors**

Huihui Liang<sup>a</sup>, Shasha Wang<sup>a</sup>, Shixiang Lu<sup>a,\*</sup>, Wenguo Xu<sup>a</sup>, Min Zhou<sup>b</sup>

## **S1 Preparation of Nd<sub>2</sub>O<sub>3</sub>/Co<sub>3</sub>O<sub>4</sub>/NF composite electrode**

0.6 mmol (0.175 g) Co(NO<sub>3</sub>)<sub>2</sub>·6H<sub>2</sub>O, 0.6 mmol (0.247 g) Nd(CH<sub>3</sub>COO)<sub>3</sub>·5H<sub>2</sub>O and 1 mmol (0.060 g) urea were dissolved in 15 mL of deionized water and stirred magnetically for 40 min to form a homogeneous solution. A portion of the above-treated NF and mixed solution was transferred to an autoclave lined with polytetrafluoroethylene and reacted for 12 h in an oven at 140 °C. After being washed with ethanol and deionized water, the Nd<sub>2</sub>O<sub>3</sub>/Co<sub>3</sub>O<sub>4</sub> precursor was dried in an oven at 90 °C for 4 h. After 2 h of annealing in a muffle furnace at 250 °C, the Nd<sub>2</sub>O<sub>3</sub>/Co<sub>3</sub>O<sub>4</sub>/NF composite electrode was produced.

## **S2 Preparation of Nd<sub>2</sub>O<sub>3</sub>/rGO/NF composite electrode**

In 7.5 mL of deionized water, 0.6 mmol (0.247 g) Nd(CH<sub>3</sub>COO)<sub>3</sub>·5H<sub>2</sub>O and 1 mmol (0.060 g) urea were dissolved and magnetically agitated for 40 min to generate a homogenous solution. Then, 7.5 mL of homogenous graphene oxide suspension (2 mg/mL) was added. Continue magnetic stirring for 40 min to ensure thorough mixing. The processed NF and combined solution were placed in an autoclave with polytetrafluoroethylene and reacted for 12 h in an oven at 140 °C. The precursor was cleaned with ethanol and deionized water before being dried in a 90 °C oven for 4 h. Finally, the Nd<sub>2</sub>O<sub>3</sub>/rGO/NF composite electrode was created by annealing it for 2 h in a muffle furnace at 250 °C.

### **S3 Preparation of Co<sub>3</sub>O<sub>4</sub>/rGO/NF composite electrode**

0.6 mmol (0.175 g) Co(NO<sub>3</sub>)<sub>2</sub>·6H<sub>2</sub>O and 1 mmol (0.060 g) urea were diluted in 7.5 mL deionized water and magnetically agitated for 40 min to generate a homogenous solution. Then 7.5 mL of homogenous graphene oxide suspension (2 mg/mL, ultrasonication for 2 h) was added. Continue magnetic stirring for 40 min to thoroughly combine. A portion of the above-mentioned treated NF and the combined solution were placed to an autoclave with polytetrafluoroethylene and reacted in an oven at 140 °C for 12 h. The precursor was rinsed with ethanol and deionized water before being dried in an oven at 90 °C for 4 h. Finally, the Co<sub>3</sub>O<sub>4</sub>/rGO/NF composite electrode was formed after 2 h of annealing in a muffle furnace at 250 °C.

### **S4 Preparation of rGO/NF composite electrode**

7.5 mL of deionized water and 7.5 mL of 2 mg/mL graphene oxide suspension were added to the beaker, mixed well with magnetic stirring for 40 min. A portion of the above-mentioned treated NF and the combined solution were placed to an autoclave with polytetrafluoroethylene and reacted in an oven at 140 °C for 12 h. The surface of the NF was cleaned with ethanol and deionized water before being dried in a 90 °C oven for 4 h. Finally, the rGO/NF composite electrode was formed after 2 h of annealing in a muffle furnace at 250 °C.

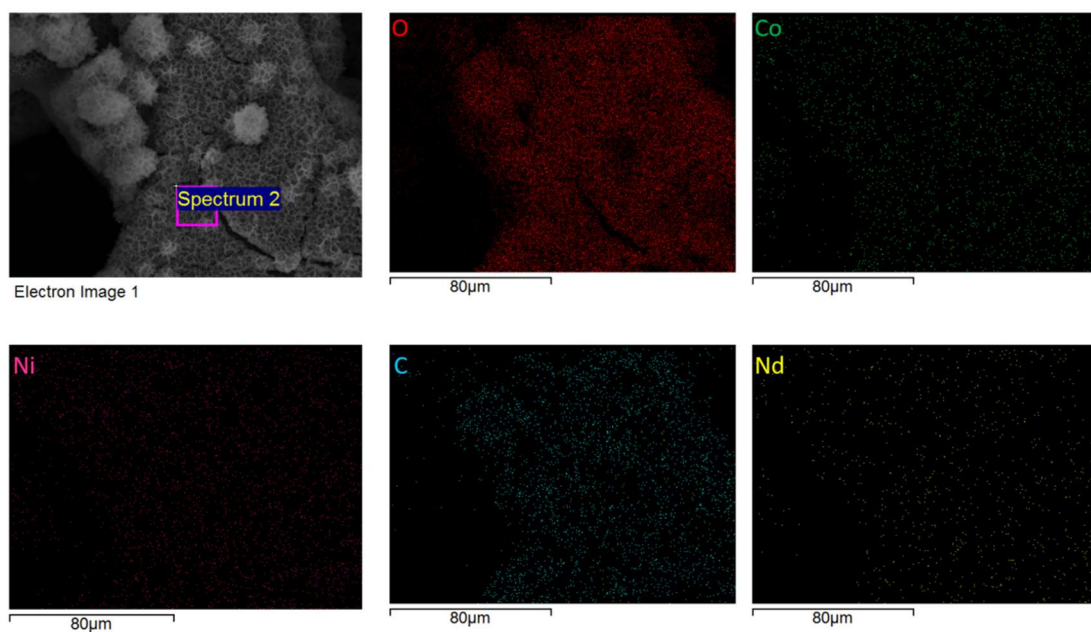

**Figure S1.** EDS elemental mapping images of the composite (Nd, Co, Ni, O and C).

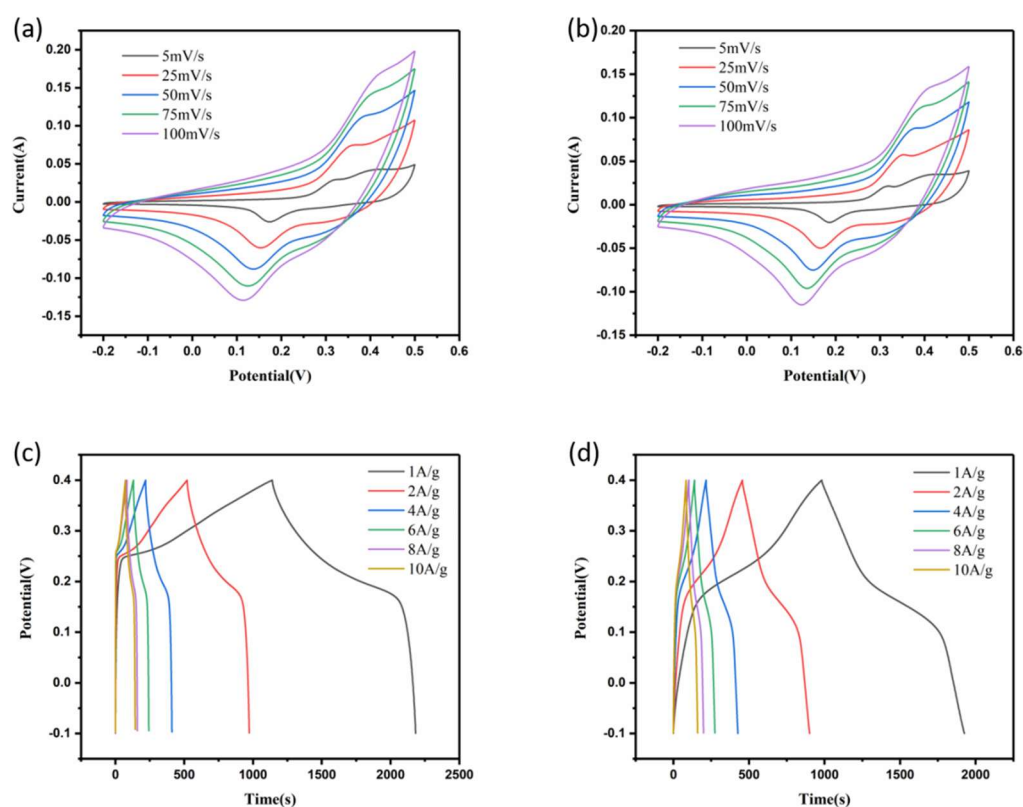

**Figure S2** (a, b) CV curves of  $\text{Co}_3\text{O}_4/\text{rGO}/\text{NF}$  and  $\text{Nd}_2\text{O}_3/\text{rGO}/\text{NF}$  electrodes under different scan rates; (c, d) GCD curves of  $\text{Co}_3\text{O}_4/\text{rGO}/\text{NF}$  and  $\text{Nd}_2\text{O}_3/\text{rGO}/\text{NF}$  electrodes at different current densities.
